# Supplementary material for: Objective Patterns of Face Recognition Deficits in 165 Adults with Self-Reported Developmental Prosopagnosia
Source: MDPI journal article supplement (doi:10.3390/brainsci9060133), 2019-06-06
Supplement: s1 [file s1]

**Supplementary Materials S2.** SDT results for cases with significant dissociations between impaired famous face test (FFT) performance and intact CFPT and CFMT scores. The sequential Bonferroni correction is applied to correct for multiple comparisons.

| Case  | % Correct |       |       | FFT v CFPT |          |                | FFT v CFMT |          |                |
|-------|-----------|-------|-------|------------|----------|----------------|------------|----------|----------------|
|       | CFPT      | CFMT  | FFT   | <i>t</i>   | <i>p</i> | % More Extreme | <i>T</i>   | <i>p</i> | % More Extreme |
| DP001 | 73.61     | 72.22 | 30.95 | 4.18       | .001     | 0.01           | 4.67       | .001     | 0.01           |
| DP002 | 87.50     | 73.61 | 55.10 | 3.55       | .001     | 0.04           | 2.68       | .01      | 0.48           |
| DP013 | 59.72     | 70.83 | 36.00 | 2.69       | .01      | 0.46           | 4.13       | .001     | 0.01           |
| DP016 | 77.78     | 62.50 | 16.95 | 5.54       | .001     | 0.01           | 5.18       | .001     | 0.01           |
| DP018 | 79.17     | 73.61 | 55.56 | 2.84       | .01      | 0.31           | 2.64       | .01      | 0.53           |
| DP020 | 73.61     | 58.33 | 45.00 | 3.16       | .01      | 0.12           | 2.44       | .02      | 0.89           |
| DP024 | 65.28     | 80.56 | 15.91 | 4.61       | .001     | 0.01           | 6.59       | .001     | 0.01           |
| DP025 | 77.78     | 66.67 | 27.91 | 4.74       | .001     | 0.01           | 4.53       | .001     | 0.01           |
| DP029 | 81.94     | 59.72 | 46.15 | 3.75       | .001     | 0.02           | 2.44       | .02      | 0.89           |
| DP033 | 76.39     | 81.94 | 38.81 | 5.75       | .001     | 0.01           | 8.48       | .001     | 0.01           |
| DP034 | 79.17     | 70.83 | 60.00 | 3.79       | .001     | 0.02           | 4.10       | .001     | 0.01           |
| DP037 | 62.50     | 75.00 | 52.00 | 2.99       | .01      | 0.23           | 5.77       | .001     | 0.01           |
| DP040 | 69.44     | 59.72 | 28.30 | 6.18       | .001     | 0.01           | 8.03       | .001     | 0.01           |
| DP045 | 72.22     | 81.94 | 68.97 | 2.15       | .04      | 1.87           | 3.74       | .001     | 0.03           |
| DP048 | 80.56     | 91.67 | 57.14 | 4.23       | .001     | 0.01           | 6.54       | .001     | 0.01           |
| DP058 | 63.89     | 72.22 | 61.67 | 2.10       | .04      | 2.09           | 3.97       | .001     | 0.01           |
| DP060 | 68.06     | 66.67 | 28.81 | 5.99       | .001     | 0.01           | 8.60       | .001     | 0.01           |
| DP061 | 72.22     | 66.67 | 42.37 | 4.97       | .001     | 0.01           | 6.49       | .001     | 0.01           |
| DP064 | 69.44     | 70.83 | 60.00 | 4.10       | .01      | 0.01           | 4.10       | .001     | 0.01           |
| DP065 | 68.06     | 61.11 | 53.33 | 3.40       | .01      | 0.07           | 4.23       | .001     | 0.01           |
| DP077 | 66.67     | 69.44 | 54.24 | 3.16       | .01      | 0.14           | 4.88       | .001     | 0.01           |
| DP080 | 65.28     | 69.44 | 50.91 | 3.38       | .01      | 0.08           | 5.41       | .001     | 0.01           |
| DP087 | 63.89     | 68.06 | 44.19 | 3.82       | .001     | 0.02           | 3.43       | .001     | 0.07           |
| DP090 | 68.06     | 56.94 | 52.83 | 3.36       | .01      | 0.08           | 2.03       | .05      | 2.44           |
| DP091 | 76.39     | 54.17 | 40.00 | 5.45       | .001     | 0.01           | 3.00       | .01      | 0.23           |
| DP094 | 70.83     | 73.61 | 29.17 | 5.99       | .001     | 0.01           | 5.07       | .001     | 0.01           |
| DP095 | 66.67     | 58.33 | 37.74 | 4.74       | .001     | 0.01           | 3.43       | .001     | 0.07           |
| DP098 | 76.39     | 69.44 | 34.88 | 5.96       | .001     | 0.01           | 4.33       | .001     | 0.01           |
| DP100 | 61.11     | 63.89 | 35.59 | 4.42       | .001     | 0.01           | 3.94       | .001     | 0.01           |
| DP104 | 69.44     | 66.67 | 56.76 | 3.10       | .01      | 1.71           | 2.25       | .03      | 1.49           |
| DP105 | 81.94     | 66.67 | 47.46 | 5.24       | .001     | 0.01           | 3.07       | .01      | 0.19           |
| DP113 | 59.72     | 56.94 | 41.38 | 3.70       | .001     | 0.03           | 3.03       | .01      | 0.21           |
| DP125 | 55.56     | 73.61 | 38.60 | 3.58       | .001     | 0.04           | 4.24       | .001     | 0.01           |
| DP128 | 65.28     | 58.33 | 48.33 | 3.54       | .001     | 0.05           | 2.51       | .02      | 0.81           |
| DP129 | 65.28     | 58.33 | 28.33 | 5.54       | .001     | 0.01           | 4.26       | .001     | 0.01           |
| DP130 | 65.28     | 55.56 | 19.28 | 6.44       | .001     | 0.01           | 4.89       | .001     | 0.01           |
| DP139 | 56.94     | 51.39 | 27.27 | 3.92       | .001     | 0.01           | 4.38       | .001     | 0.01           |
| DP142 | 75.00     | 66.67 | 48.72 | 4.02       | .001     | 0.01           | 3.37       | .001     | 0.07           |
| DP154 | 59.72     | 52.78 | 34.62 | 3.58       | .001     | 0.04           | 3.78       | .001     | 0.02           |
| DP157 | 56.94     | 59.72 | 40.00 | 2.80       | .01      | 0.36           | 3.73       | .001     | 0.02           |
| DP158 | 58.33     | 58.33 | 22.92 | 2.42       | .02      | 1.02           | 2.95       | .01      | 0.27           |
| DP165 | 47.22     | 41.67 | 8.33  | 2.42       | .02      | 1.01           | 2.77       | .01      | 0.43           |
